# Supplementary material
Source: HighWire-hosted journal article supplement (https://bio.biologists.org/content/suppl/2017/04/05/bio.022426)
Supplement: BIO022426supp.pdf [file BIO022426supp.pdf]

## Supplement Information

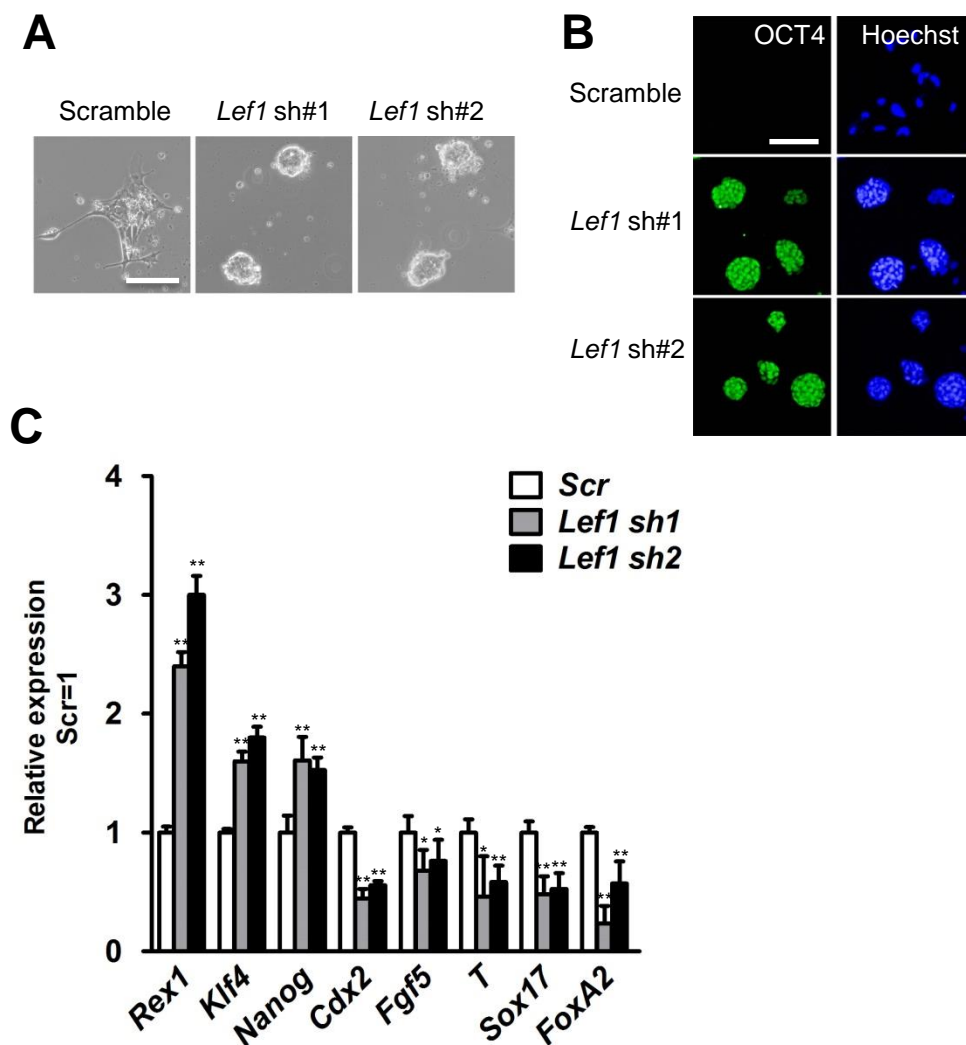

**Fig. S1. Knockdown of *Lef1* promotes R1 ESC self-renewal.**

(A) Morphology of scramble control and *Lef1* knockdown R1 ESCs cultured in N2B27/CHIR condition for five passages. Scar bar, 100  $\mu$ m.

(B) Immunostaining of scramble control and *Lef1* knockdown R1 ESCs for OCT4. Scar bar, 100  $\mu$ m.

(C) qRT-PCR analysis of *Klf4*, *Nanog*, *Rex1*, *Cdx2*, *Fgf5*, *T*, *Sox17* and *FoxA2* expression in Scr and *Lef1* shRNA mESCs cultured in N2B27/CHIR condition. Data represent mean  $\pm$  s.d. of three biological replicates. \*P<0.05, \*\*P<0.01 vs Scr.

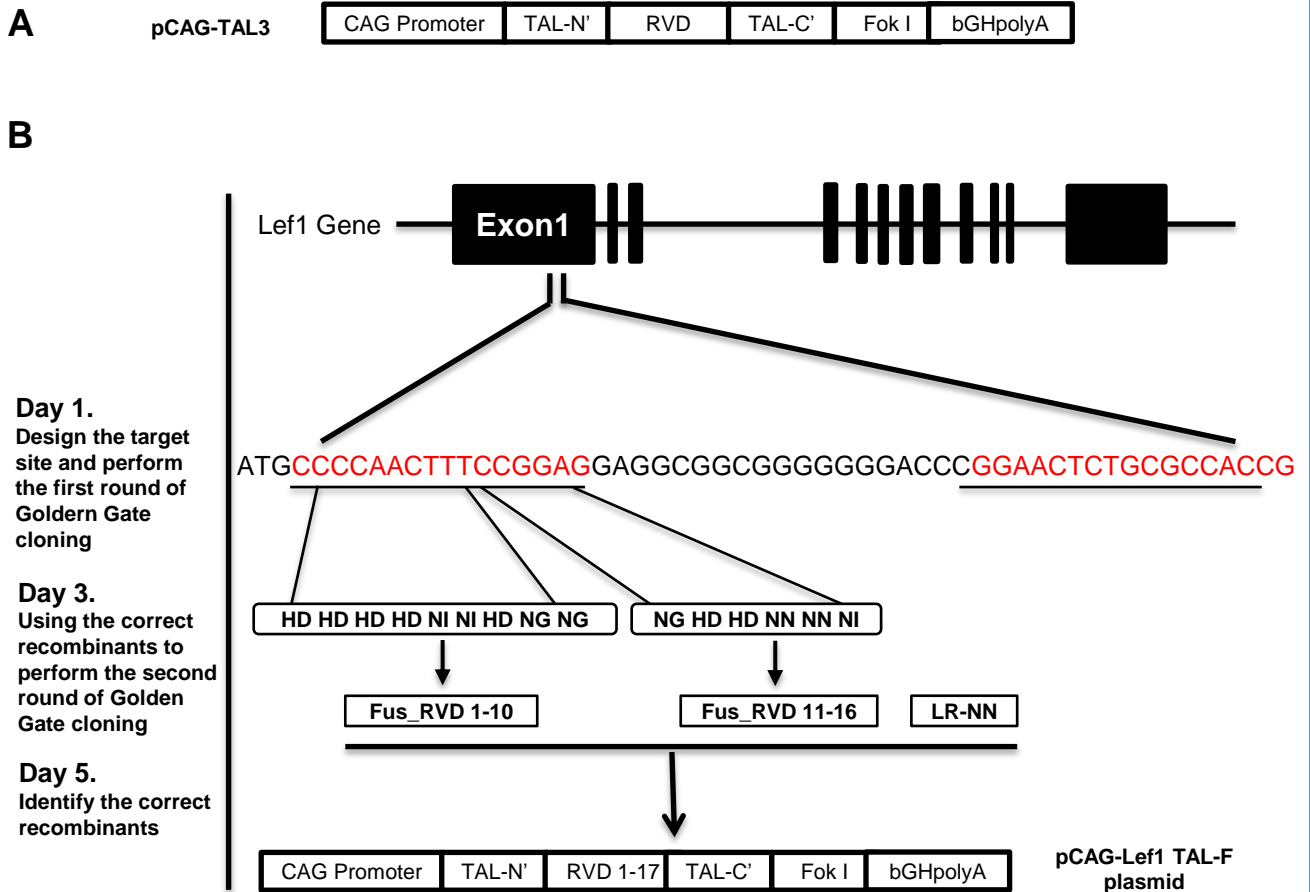

**C** Lef1 mutant: ATGCCACAGCTATCGGGTGGAGGCGGCGGGGGGACCCAGAGCTATGTGCTACGG

**Fig. S2. The strategy for constructing *Lef1* targeting TALENs**

(A) The structure of plasmid pCAG-TAL3 (Addgene.

<http://www.addgene.org/TALeffector/goldengateV2/>).

(B) The TALEN target is located in exon 1 of *Lef1*. The left and right TALENs binding sequences are underlined. The pCAG-*Lef1*-TAL-F was constructed using two rounds of Golden Gate cloning method.

(C) Blue sequences were synonymous mutation corresponding to wild type sequences of *Lef1*. Overlapping PCR was used to generate the *Lef1* mutations

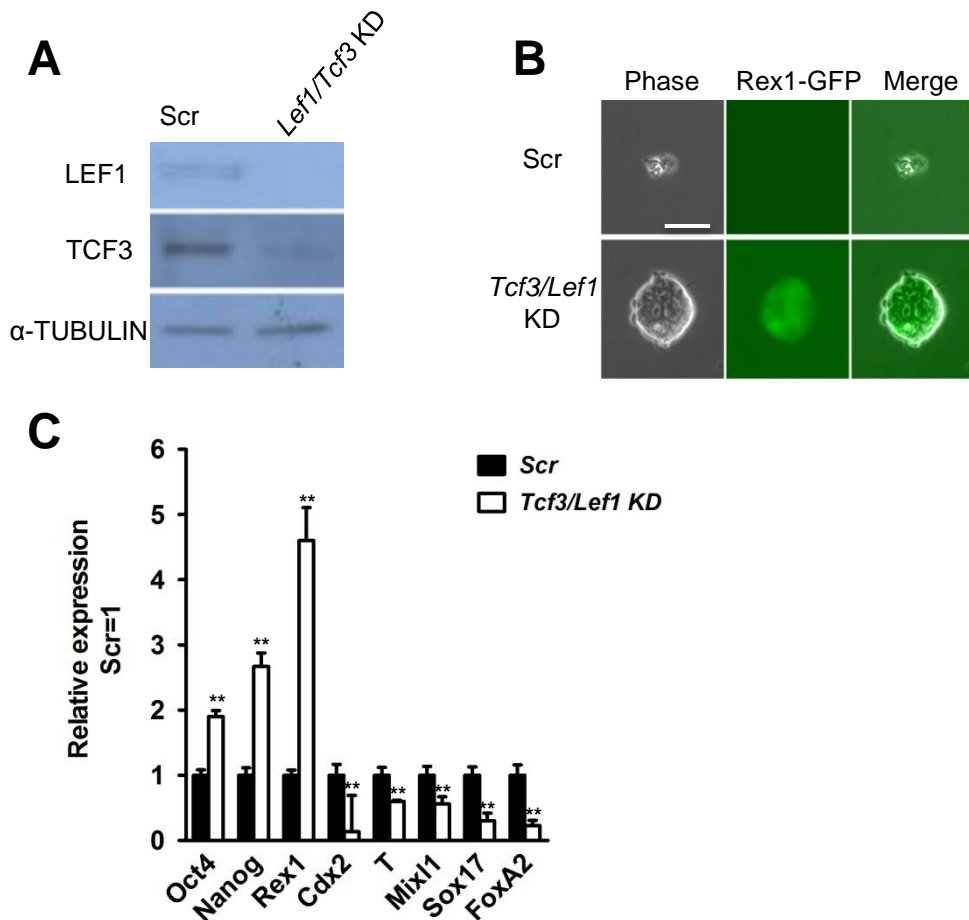

**Fig. S3. Double knockdown *Tcf3* and *Lef1* delayed differentiation of Rex1-GFP mouse ESCs.**

(A) Western blot analysis of LEF1 and TCF3 proteins in *Lef1* and *Tcf3* double knockdown (KD) and Scramble (Scr) control mouse ESCs.

(B) Morphology of scramble control and double knockdown of *Tcf3* and *Lef1* mouse ESCs cultured in N2B27 condition for five passages. Scar bar, 100  $\mu$ m.

(C) qRT-PCR analysis of *Oct4*, *Nanog*, *Rex1*, *Cdx2*, *T*, *Mixl1*, *Sox17*, and *FoxA2* expression in Scr and *Tcf3/Lef1* dKD mESCs cultured in condition. Data represent mean  $\pm$  s.d. of three biological replicates. \*\*P<0.01 vs Scr.

**Table S1. List of primers used for qRT-PCR analysis.**

| <b>Gene</b>  | <b>Forward sequence (5'-3')</b> | <b>Reverse sequence (5'-3')</b> |
|--------------|---------------------------------|---------------------------------|
| <i>Gapdh</i> | TGTGAGGGAGATGCTCAGTG            | TGTTCTACCCCAATGTGT              |
| <i>Sox17</i> | AGCCATTTCTCCGTGGTGT             | AACACTGCTTCTGGCCCTCAG           |
| <i>Oct4</i>  | GAAGCAGAAGAGGATCACCTTG          | TTCTTAAGGCTGAGCTGCAAG           |
| <i>Nanog</i> | TCCAGAAGAGGGCGTCAGAT            | CAAATCCCAGCAACCACATG            |
| <i>Rex1</i>  | TCACTGTGCTGCCTCCAAGT            | GGGCACTGATCCGCAAAC              |
| <i>Klf2</i>  | AGGCCTGTGGGTTTCGCTATAAA         | GGCAAATTATGGCTCAAAGTAGCAG       |
| <i>Egr1</i>  | CCACAACAACAGGGAGACCT            | ACTGAGTGGCGAAGGCTTTA            |
| <i>Isx</i>   | AGAGGACTCCAGGCAGACAA            | AGCTGCTCTGTGGTGAAGGT            |
| <i>Lef1</i>  | TCACTGTCAGGCGACACTTC            | TGAGGCTTCACGTGCATTAG            |
| <i>Tcf3</i>  | AGTTCAACCCCTCTGTCCT             | TGCCTGCCACTCTGATACTG            |
| <i>Esrrb</i> | TTTCTGGAACCCATGGAGAG            | AGCCAGCACCTCCTTCTACA            |
| <i>Gata4</i> | TCTCACTATGGGCACAGCAG            | GCGATGTCTGAGTGACAGGA            |
| <i>Gata6</i> | TCCTCCCCTGCCGAAGTC              | AGGGCCAGAGCACACCAA              |
| <i>Fgf5</i>  | GCAGCCCACGGGTCAA                | CGGTTGCTCGGACTGCTT              |
